# Supplementary material
Source: publisher figshare collection journal article supplement (https://acs.figshare.com/ndownloader/files/18022109)
Supplement: Supplementary file 1 [file 18022109]

**Supporting Information**

**Of**

**Mechanistic Insight into the**

**Chemiluminescent Decomposition of**

***Cypridina* Dioxetanone and the**

**Chemiluminescent, Fluorescent Properties**

**of the Light Emitter of *Cypridina***

**Bioluminescence**

Chun-Gang Min,<sup>\*,†,‡,§</sup> Qing-Bo Liu,<sup>†,‡,§</sup> Yan Leng,<sup>†</sup> Carla M. Magalhães<sup>⊥</sup> Shao-Jun Huang,<sup>‡,§</sup> Chun-Xia Liu,<sup>‡,§</sup> Xi-Kun Yang,<sup>‡,§</sup> Luís Pinto da Silva<sup>\*,⊥,#</sup>

<sup>†</sup>School of Materials Science and Engineering, Kunming University of Science and Technology,

Kunming 650093 P. R. China

<sup>‡</sup> Research Center for Analysis and Measurement, Kunming University of Science and Technology,

Kunming 650093 P. R. China

<sup>§</sup> Analysis and Test Center of Yunnan Province, Kunming 650093 P. R. China

<sup>†</sup> Faculty of Chemical Engineering, Kunming University of Science and Technology, Kunming 650093,  
PR China

<sup>⊥</sup> Chemistry Research Unit (CIQUP), Faculty of Sciences of University of Porto, R. Campo Alegre  
697, 4169-007 Porto, Portugal.

<sup>#</sup> LACOMEPI, GreenUPorto, Department of Geosciences, Environment and Territorial Planning,  
Faculty of Sciences of University of Porto, R. Campo Alegre 697, 4169-007 Porto, Portugal.

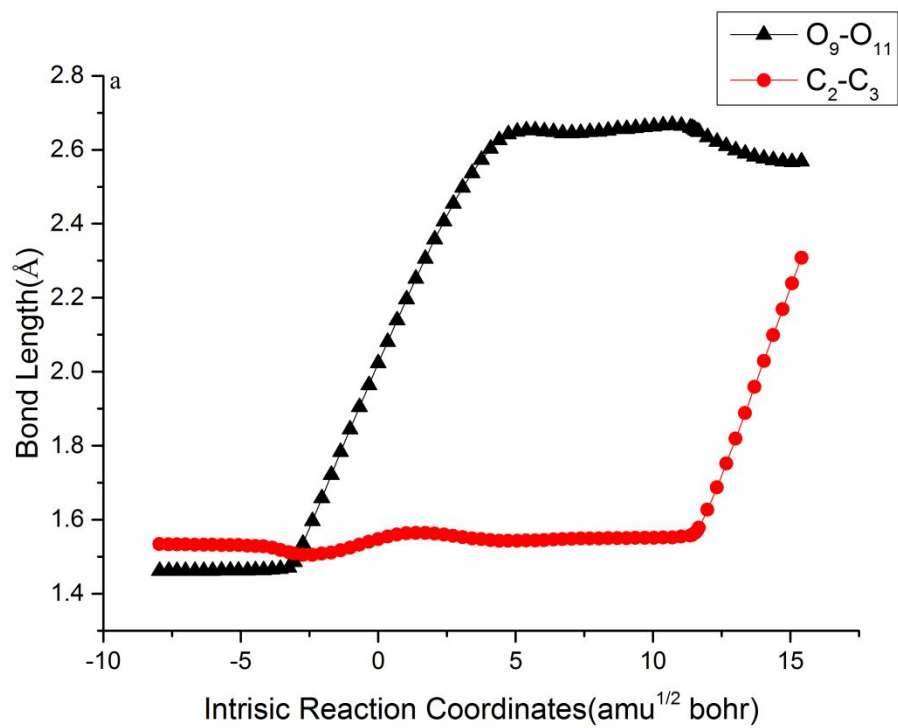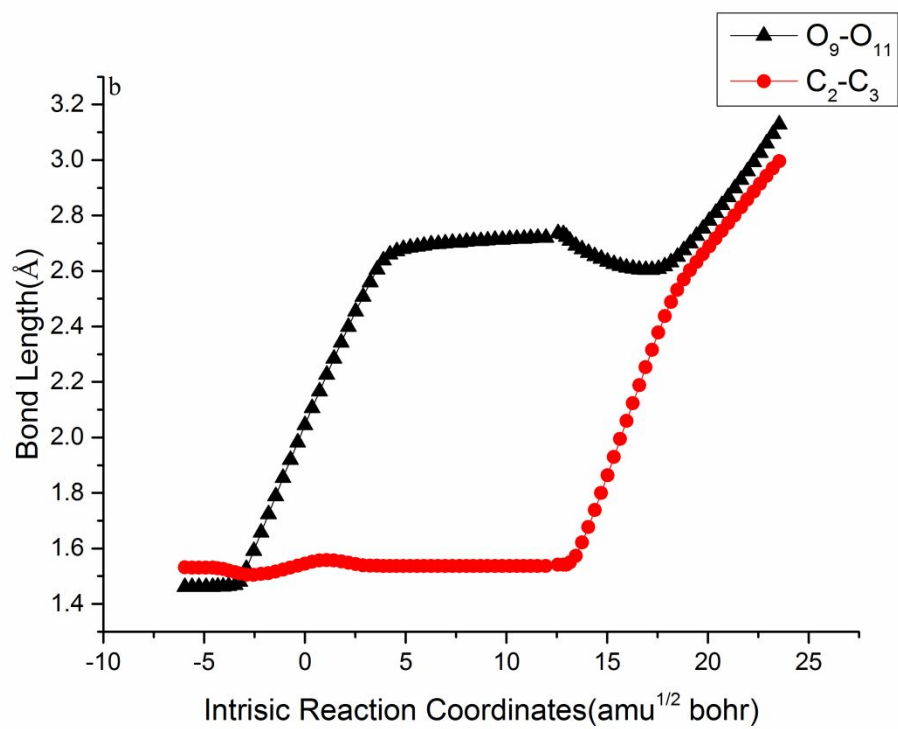

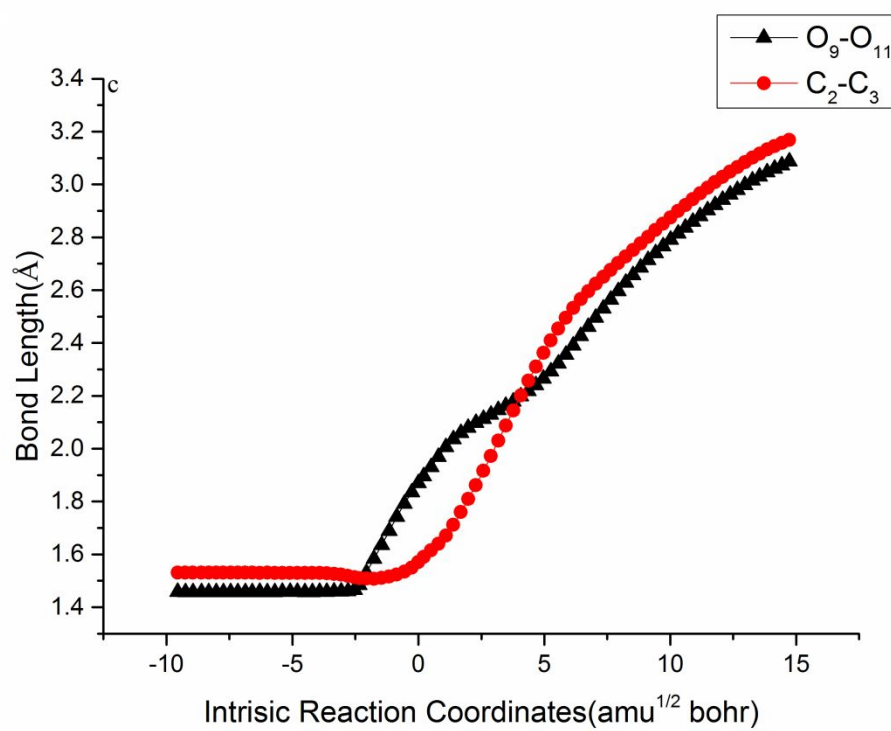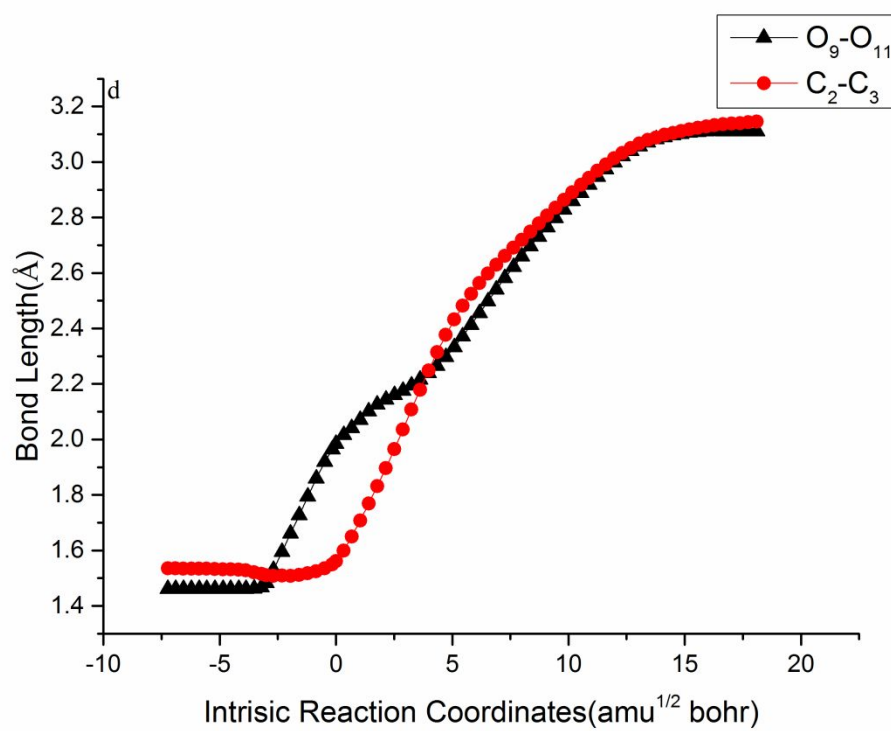

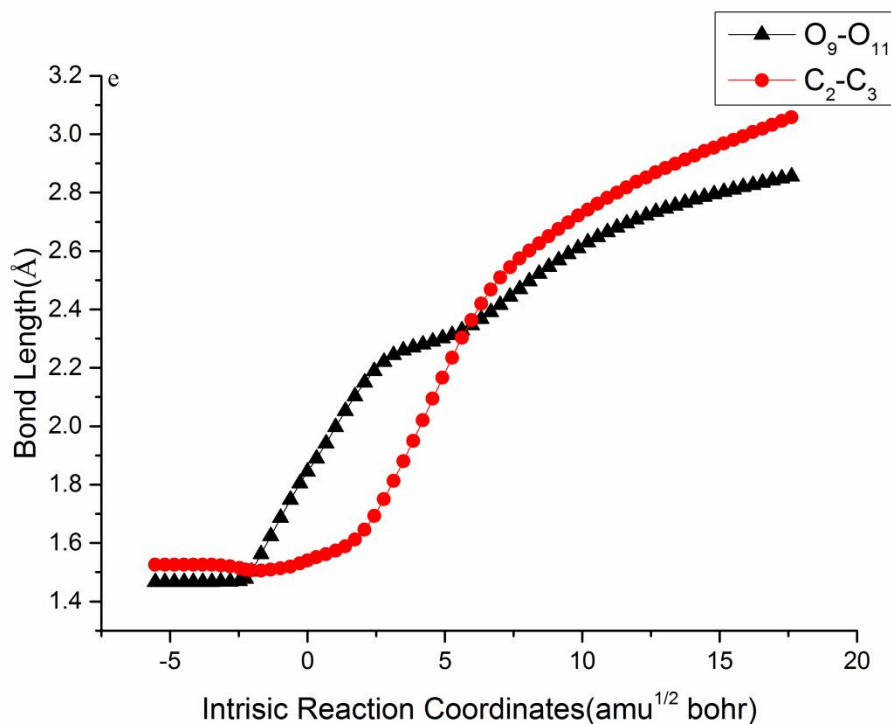

**Figure S1.** Variation of O<sub>9</sub>-O<sub>11</sub> and C<sub>2</sub>-C<sub>3</sub> bond length (in Å) during the thermolysis reaction of C-DO acylamino+NH<sub>2</sub><sup>+</sup> (a), C-DO acylamino (b), C-DO amide+NH<sub>2</sub><sup>+</sup> (c), C-DO acylimino (d) and C-DO amide ion (e), as a function of intrinsic reaction coordinates. The calculations were made at the  $\omega$ B97XD/6-31+G(d) level of theory.

For C-DO acylamino+NH<sub>2</sub><sup>+</sup>, the O<sub>9</sub>-O<sub>11</sub> bond is elongated by 0.561 Å from 1.462 to 2.023 Å in TS, while C<sub>2</sub>-C<sub>3</sub> remains nearly unchanged (slightly increasing from 1.534 to 1.547 Å). The C<sub>2</sub>-C<sub>3</sub> bond begins to break after TS, which indicates that the broken of the O<sub>9</sub>-O<sub>11</sub> and C<sub>2</sub>-C<sub>3</sub> bonds is asynchronous.

The decomposition of C-DO acylamino starts with dissociation of the O<sub>9</sub>-O<sub>11</sub> bond, and the following step is the dissociation of the C<sub>2</sub>-C<sub>3</sub> bond. The bond length of O<sub>9</sub>-O<sub>11</sub> in TS<sub>O-O</sub> (2.045 Å) is 0.585 Å longer than that in the R, but the C<sub>2</sub>-C<sub>3</sub> bond lengths in the R and TS<sub>O-O</sub> are 1.534 and 1.545 Å, respectively, it changes not much. The bond lengths of O<sub>9</sub>-O<sub>11</sub> are 2.735 and 2.709 Å in Int and TS<sub>C-C</sub>, respectively. The bond lengths of C<sub>2</sub>-C<sub>3</sub> are 1.540 and 1.549 Å in Int and TS<sub>C-C</sub>, respectively. It indicates that the O<sub>9</sub>-O<sub>11</sub> bond is broken completely in Int and the C<sub>2</sub>-C<sub>3</sub> bond gradually breaks after Int. So the dissociation of the O<sub>9</sub>-O<sub>11</sub> and C<sub>2</sub>-C<sub>3</sub> bonds occur

sequentially.

For C-DO amide- $\text{NH}_2^+$ , C-DO acylimino and C-DO amide ion, The  $\text{O}_9\text{-O}_{11}$  bonds are elongated by 0.524, 0.411 and 0.378 Å, respectively, while  $\text{C}_2\text{-C}_3$  remains nearly unchanged. The  $\text{C}_2\text{-C}_3$  bond gets down breaking after TS, which illustrates that the broken of the  $\text{O}_9\text{-O}_{11}$  and  $\text{C}_2\text{-C}_3$  bonds is asynchronous.

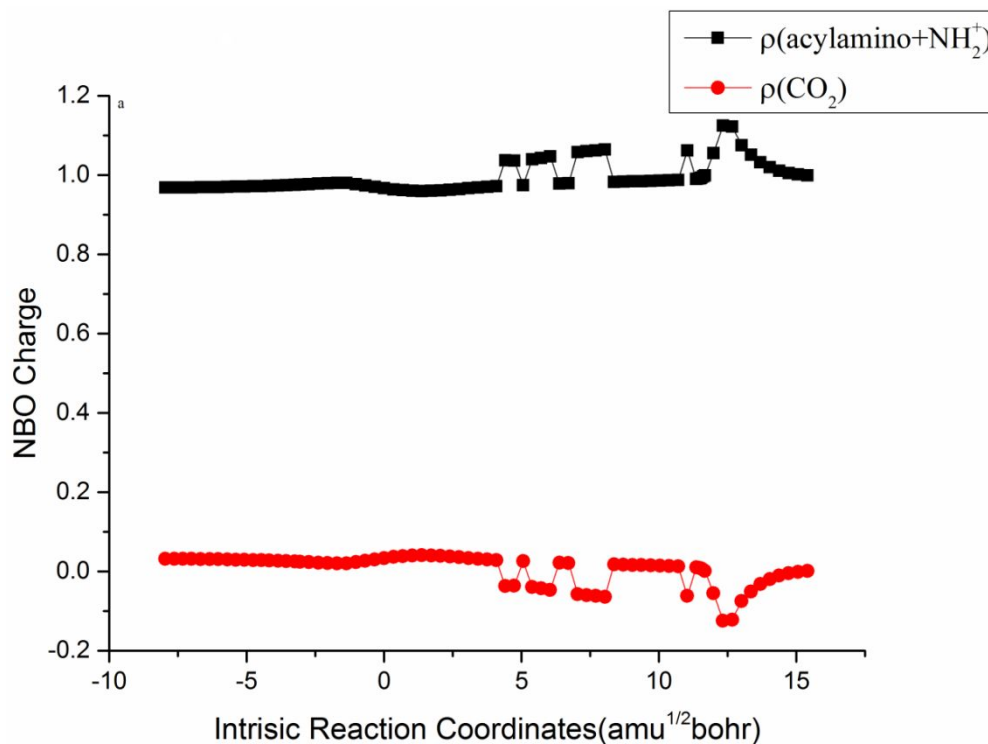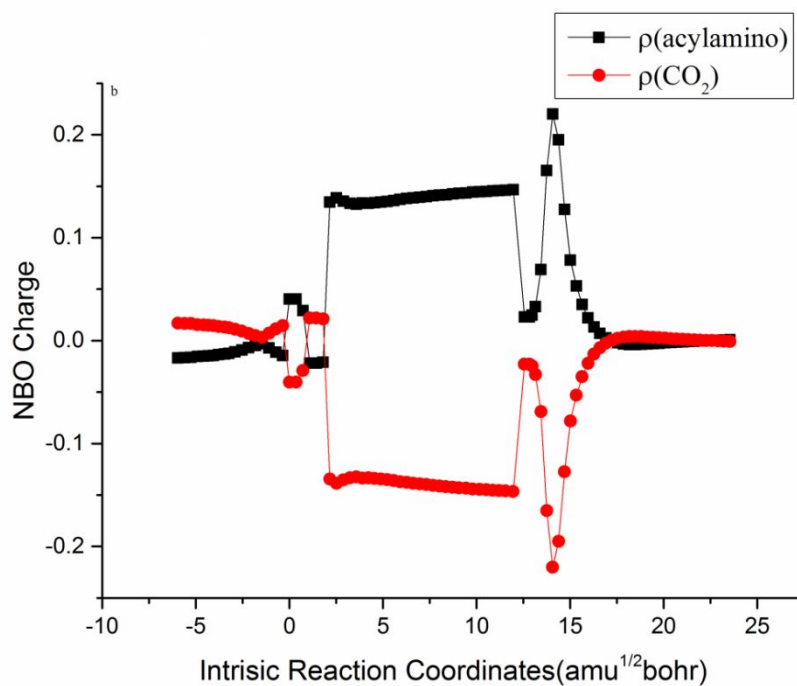

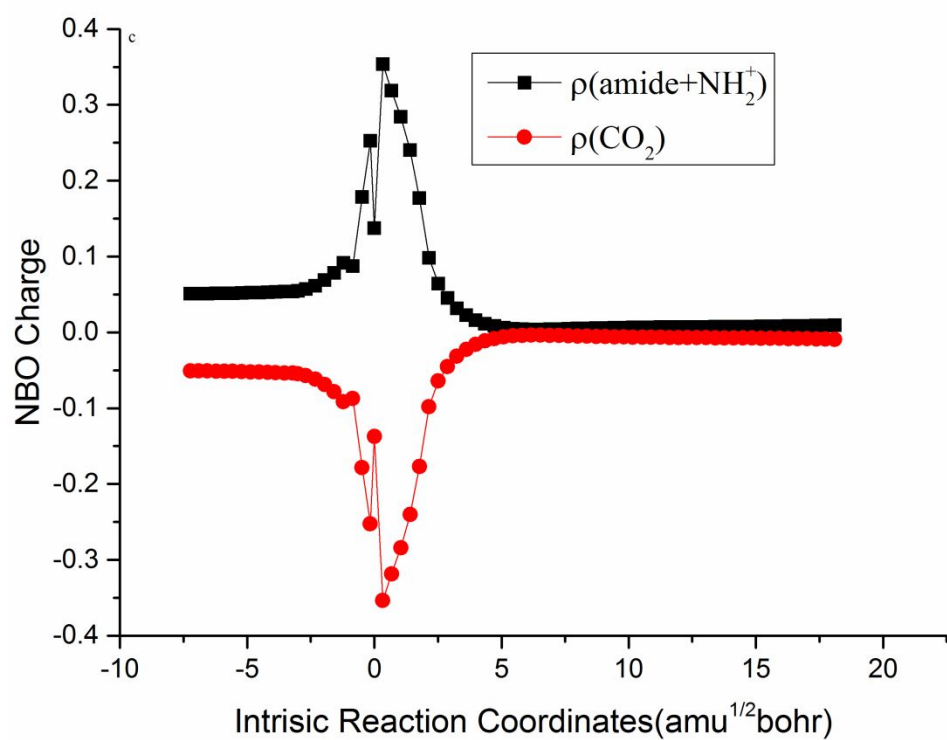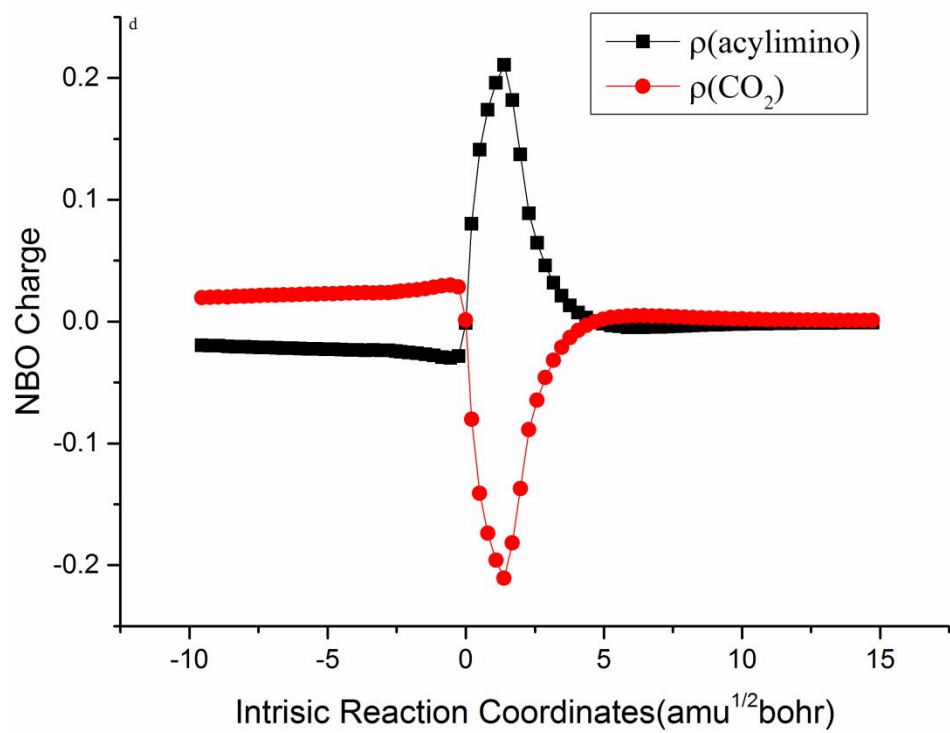

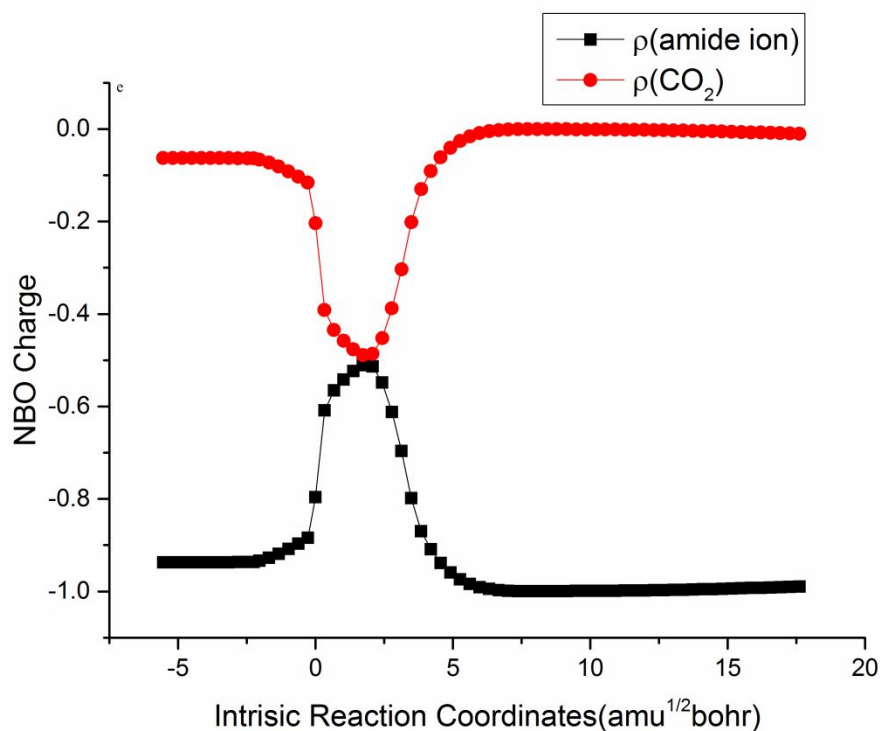

**Figure S2.** NBO charge of the CO<sub>2</sub> and oxyluciferin moieties of C-DO acylamino+NH<sub>2</sub><sup>+</sup> (a), C-DO acylamino (b), C-DO amide+NH<sub>2</sub><sup>+</sup> (c), C-DO acylimino (d) and C-DO amide ion (e).

**Table S1** Computed ground states dissociation constants (pK) of all forms of C-DO in diethyl ether and water.

|                 | diethyl ether | water |                 | diethyl ether | water  |
|-----------------|---------------|-------|-----------------|---------------|--------|
| pK <sub>A</sub> | 12.53         | 17.01 | pK <sub>B</sub> | 20.33         | 25.87  |
| pK <sub>C</sub> | 16.91         | 15.92 | pK <sub>D</sub> | 2.98          | -2.48  |
| pK <sub>E</sub> | 6.40          | 7.47  | pK <sub>F</sub> | -4.81         | -11.34 |
| pK <sub>G</sub> | 29.22         | 21.57 | pK <sub>H</sub> | 21.42         | 12.71  |
| pK <sub>I</sub> | 24.84         | 22.65 |                 |               |        |

**Table S2.** Selected bond lengths (Å) and dihedral angles (deg) of the possible emitters in their fluorescent and chemiluminescent states<sup>[a]</sup>

|                                        | fluorescent state |                                    |               |                                    |          |                                    | chemiluminescent state |                                    |               |                                    |          |                                    |
|----------------------------------------|-------------------|------------------------------------|---------------|------------------------------------|----------|------------------------------------|------------------------|------------------------------------|---------------|------------------------------------|----------|------------------------------------|
|                                        | gas phase         |                                    | diethyl ether |                                    | water    |                                    | gas phase              |                                    | diethyl ether |                                    | water    |                                    |
|                                        | $\theta$          | R(C <sub>2</sub> -O <sub>9</sub> ) | $\theta$      | R(C <sub>2</sub> -O <sub>9</sub> ) | $\theta$ | R(C <sub>2</sub> -O <sub>9</sub> ) | $\theta$               | R(C <sub>2</sub> -O <sub>9</sub> ) | $\theta$      | R(C <sub>2</sub> -O <sub>9</sub> ) | $\theta$ | R(C <sub>2</sub> -O <sub>9</sub> ) |
| acylamino-NH <sub>2</sub> <sup>+</sup> | 179               | 1.238                              | 179           | 1.219                              | 179      | 1.236                              | -127                   | 1.383                              | -129          | 1.380                              | -132     | 1.376                              |
| acylamino                              | 179               | 1.212                              | 180           | 1.218                              | 180      | 1.234                              | -127                   | 1.389                              | -130          | 1.382                              | -134     | 1.380                              |
| acylimino                              | 180               | 1.246                              | -180          | 1.250                              | 179      | 1.263                              | -134                   | 1.380                              | -138          | 1.376                              | -131     | 1.385                              |
| amide+NH <sub>2</sub> <sup>+</sup>     | -174              | 1.230                              | -174          | 1.228                              | -177     | 1.251                              | -125                   | 1.405                              | -127          | 1.397                              | -131     | 1.386                              |
| amide ion                              | 175               | 1.226                              | 175           | 1.233                              | 176      | 1.260                              | -134                   | 1.388                              | -131          | 1.385                              | -130     | 1.380                              |

<sup>[a]</sup> The angle  $\theta$  is the torsional angle O<sub>9</sub>-C<sub>2</sub>-N<sub>1</sub>-C<sub>10</sub>. The atom numbering is shown in Figure 3.



**Table S3. Computed fluorescent ( $pK^{F*}$ ) and chemiluminescent ( $pK^{C*}$ ) states dissociation constants of all possible emitters in diethyl ether and water.**

|             | diethyl ether | water |             | diethyl ether | water |
|-------------|---------------|-------|-------------|---------------|-------|
| $pK_J^{F*}$ | 11.33         | 16.69 | $pK_J^{C*}$ | 12.30         | 17.46 |
| $pK_K^{F*}$ | 9.54          | 17.50 | $pK_K^{C*}$ | 10.00         | 14.78 |
| $pK_L^{F*}$ | 12.38         | 18.53 | $pK_L^{C*}$ | 15.30         | 15.73 |
| $pK_M^{F*}$ | -0.34         | 0.45  | $pK_M^{C*}$ | 1.61          | -3.13 |
| $pK_N^{F*}$ | -3.18         | -0.59 | $pK_N^{C*}$ | -3.69         | -4.07 |
| $pK_O^{F*}$ | 1.45          | -0.36 | $pK_O^{C*}$ | 3.91          | -0.45 |
| $pK_P^{F*}$ | 24.74         | 18.34 | $pK_P^{C*}$ | 20.04         | 12.34 |
| $pK_K^{F*}$ | 26.52         | 17.53 | $pK_K^{C*}$ | 22.34         | 15.02 |
| $pK_R^{F*}$ | 23.68         | 16.50 | $pK_R^{C*}$ | 17.04         | 14.08 |

$$\chi_n^{Acylamino} = \chi_n^{Acylamino - NH_2} + \times \frac{k_A}{[H]^+} \quad (S1)$$

$$\chi_n^{Amide - NH_2} = \chi_n^{Acylamino - NH_2} + \times \frac{k_A \times k_C \times k_D}{[H]^{+2}} \quad (S2)$$

$$\chi_n^{Acylimino} = \chi_n^{Acylamino - NH_2} + \times \frac{k_A \times k_B \times k_C \times k_D \times k_E \times k_F}{[H]^{+3}} \quad (S3)$$

$$\chi_n^{Amide} = \chi_n^{Acylamino - NH_2} + \times \frac{k_A \times k_B \times k_C \times k_D \times k_E \times k_F \times k_G \times k_H \times k_I}{[H]^{+6}} \quad (S4)$$

$$\chi_n^{Acylamino - NH_2} = \frac{1}{1 + \frac{k_A}{[H]^+} + \frac{k_A \times k_C \times k_D}{[H]^{+2}} + \frac{k_A \times k_B \times k_C \times k_D \times k_E \times k_F}{[H]^{+3}} + \frac{k_A \times k_B \times k_C \times k_D \times k_E \times k_F \times k_G \times k_H \times k_I}{[H]^{+6}}} \quad (S5)$$

$$\chi_n^{Acylamino} = \chi_n^{Acylamino - NH_2} + \times \frac{k_J}{[H]^+} \quad (S6)$$

$$\chi_n^{Amide - NH_2} = \chi_n^{Acylamino - NH_2} + \times \frac{k_J \times k_L \times k_M}{[H]^{+2}} \quad (S7)$$

$$\chi_n^{Acylimino} = \chi_n^{Acylamino - NH_2} + \times \frac{k_J \times k_K \times k_L \times k_M \times k_N \times k_O}{[H]^{+3}} \quad (S8)$$

$$\chi_n^{Amide} = \chi_n^{Acylamino - NH_2} + \times \frac{k_J \times k_K \times k_L \times k_M \times k_N \times k_O \times k_P \times k_Q \times k_R}{[H]^{+6}} \quad (S9)$$

$$\chi_n^{Acylamino - NH_2} = \frac{1}{1 + \frac{k_J}{[H]^+} + \frac{k_J \times k_L \times k_M}{[H]^{+2}} + \frac{k_J \times k_K \times k_L \times k_M \times k_N \times k_O}{[H]^{+3}} + \frac{k_J \times k_K \times k_L \times k_M \times k_N \times k_O \times k_P \times k_Q \times k_R}{[H]^{+6}}} \quad (S10)$$
